# Supplementary material
Source: Springer Nature journal article supplement (https://springermedizin.de/resource/supplementary/12955_2009_671_MOESM2_ESM.pdf/9561046)

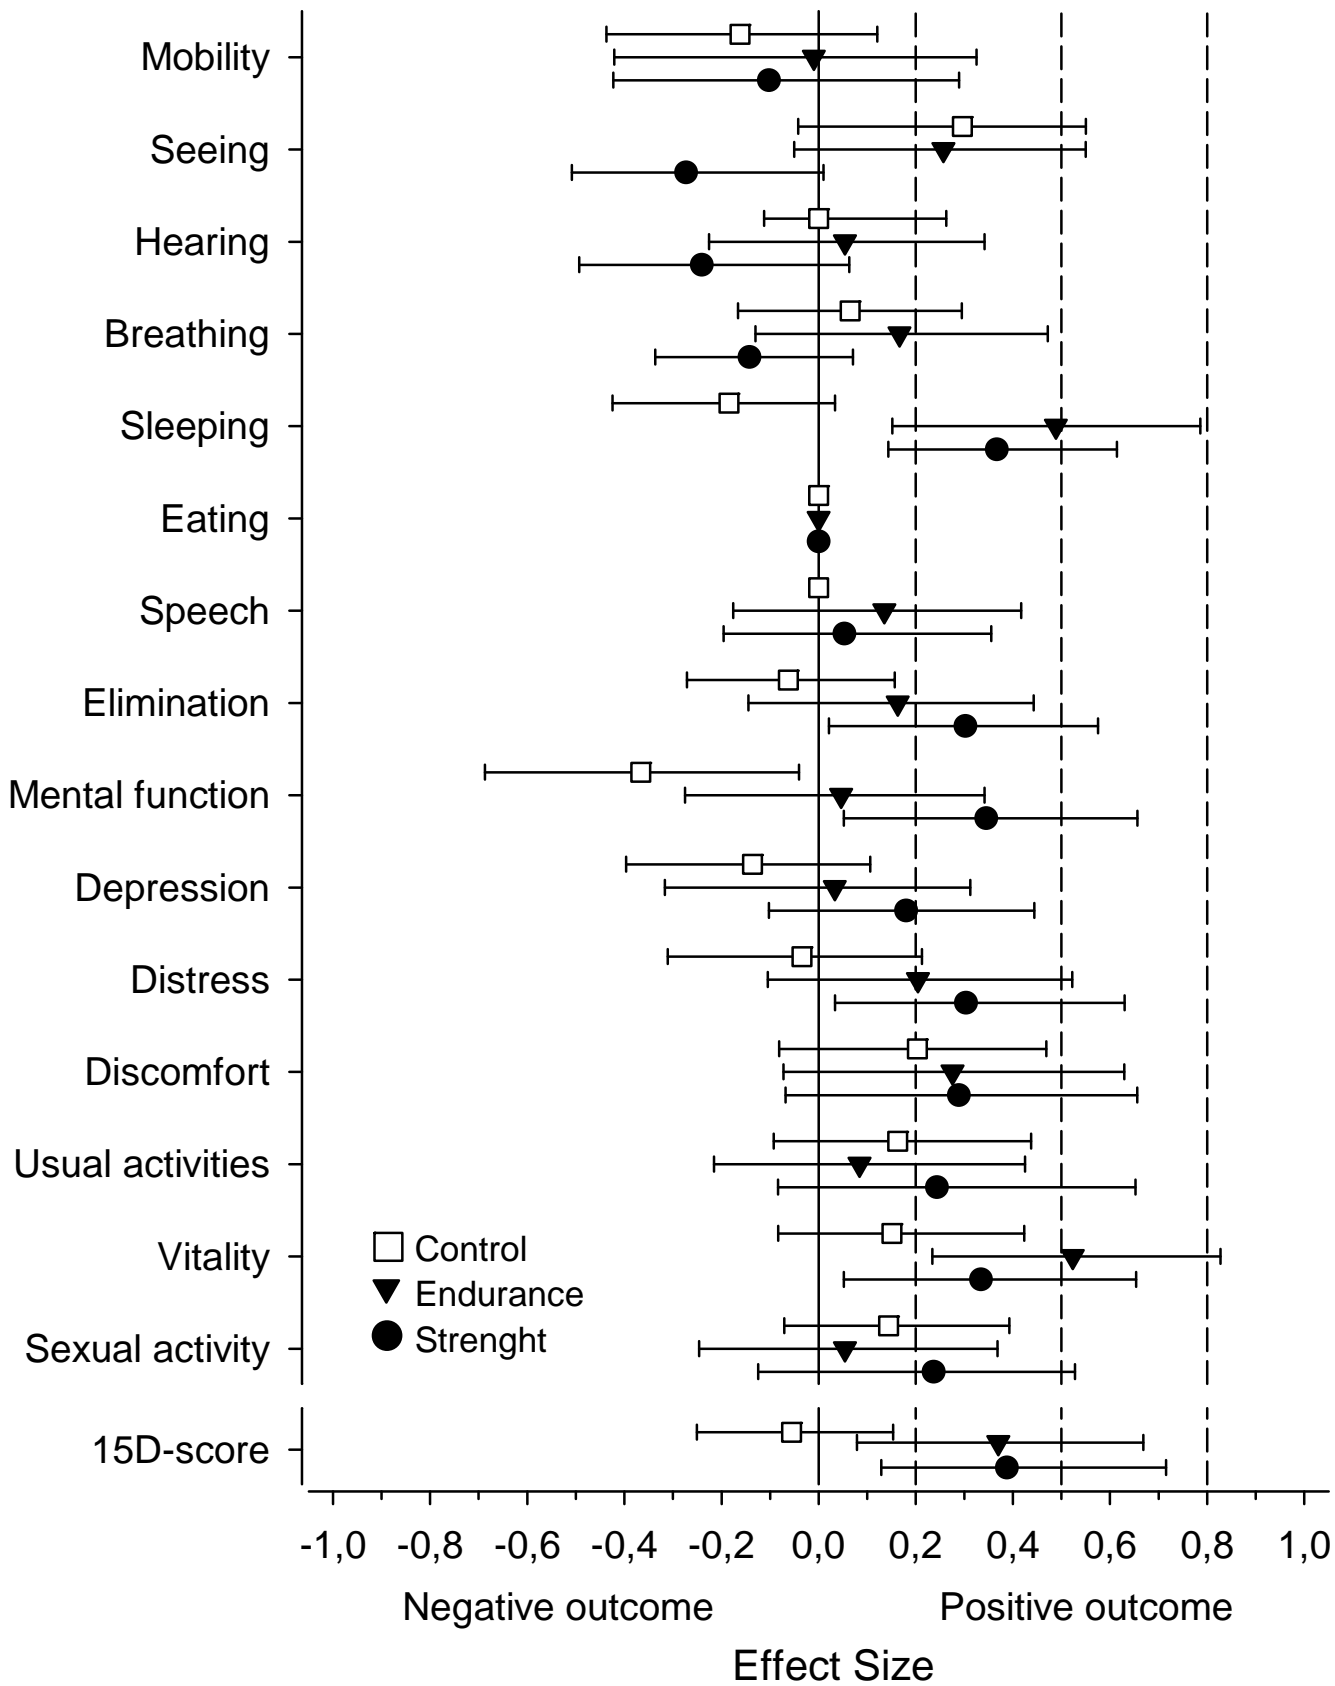

Supplement: MOESM2 [file 9561046]
